# Supplementary material for: Evaluation of the cargo contents and potential role of extracellular vesicles in osteoporosis
Source: publisher site journal article supplement (doi:10.18632/aging.203264), 2021-08-10
Supplement: Supplementary file [file aging-v13i15-203264-supplementary-material-SD1.pdf]

SUPPLEMENTARY FIGURE

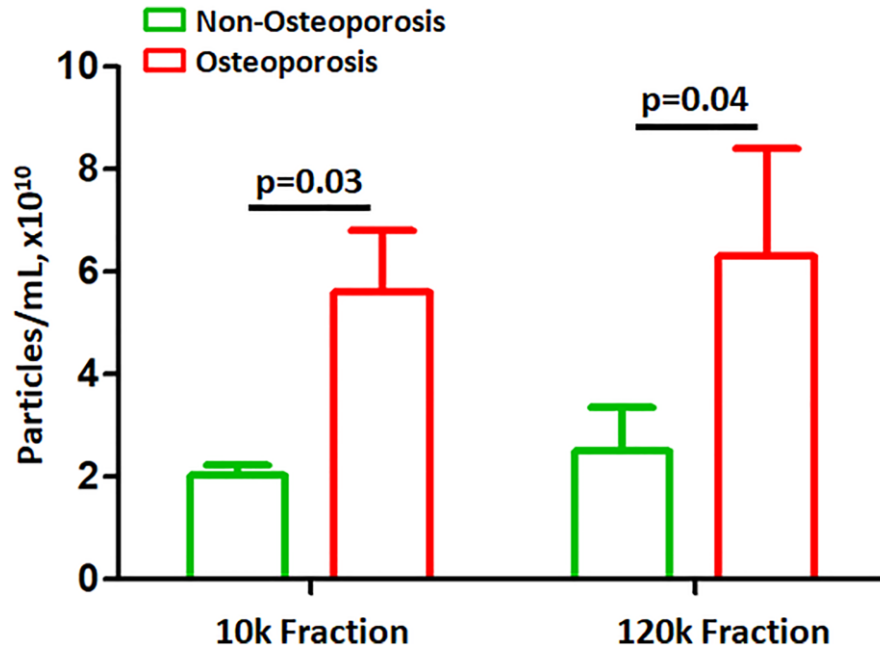

Supplementary Figure 1. NTA analysis of plasma EVs isolated from non-osteoporotic ( $n = 8$ ) and osteoporotic ( $n = 8$ ) individuals using differential ultracentrifugation. EVs were isolated from both the 10K and 120K fractions as indicated.
